# Supplementary material
Source: PubMed Central journal article supplement (PMC33496)
Supplement: pnas_98_11_6494__1.pdf [file pnas_98_11_6494__1.pdf]

Supplementary material for Tansey *et al.* (2001) *Proc. Natl. Acad. Sci. USA* **98** (11), 6494–6499. (10.1073/pnas.101042998)

**Table 1.** Comparison of phenotypes of *perilipin null mice* in present study with the study of Martinez-Botas (1)

| Parameter                          | Present study  | Ref. 1         |
|------------------------------------|----------------|----------------|
| Fecundity                          | Normal         | Normal         |
| Animal Size                        | Normal         | Normal         |
| White adipose tissue               | Reduced 63-72% | Reduced 37-74% |
| Food consumption                   | Normal         | Increased 29%  |
| Plasma leptin                      | Increased      | Decreased      |
| Glucose metabolism                 | Impaired       | Normal         |
| Plasma glucose and insulin         | Elevated       | Normal         |
| Plasma free fatty acids            | Reduced        | Normal         |
| Oxygen consumption                 | Increased      | Increased      |
| Lean body mass                     | Increased      | Increased      |
| Resistance to diet-induced obesity | Yes            | Yes            |

The comments listed compare the phenotype of the *perilipin null* animals to wild-type animals in the respective studies.

Reference:

1. Martinez-Botas, J., Anderson, J. B., Tessier, D., Lapillone, A., Chang, B. H. J., Quast, M. J., Forenstein, D., Chen, K. H. & Chan, L. (2000) *Nat. Genet.* **26**, 474-479.
