# Supplementary material
Source: PubMed Central journal article supplement (PMC33496)
Supplement: pnas_98_11_6494__2.pdf [file pnas_98_11_6494__2.pdf]

Supplementary material for Tansey *et al.* (2001) *Proc. Natl. Acad. Sci. USA* **98** (11), 6494–6499. (10.1073/pnas.101042998)

**Table 2.** Plasma chemistry of wild-type and perilipin null mice

| Genotype       | Males        |              |                  | Females       |               |                  |
|----------------|--------------|--------------|------------------|---------------|---------------|------------------|
|                | +/+          | -/-          | Significance     | +/+           | -/-           | Significance     |
| TAG, mg/dl     | 59.4 ± 7.6   | 93.1 ± 21.4  | <i>P</i> = 0.088 | 52.7 ± 4      | 74.8 ± 12.3   | <i>P</i> = 0.068 |
| Chol., mg/dl   | 113 ± 11.6   | 129.6 ± 11.7 | <i>P</i> = 0.167 | 104.4 ± 13.6  | 135.3 ± 12    | <i>P</i> = 0.058 |
| FFA, mM        | 1.18 ± 0.07  | 1.02 ± 0.07  | <i>P</i> = 0.081 | 1.475 ± 0.06  | 1.04 ± 0.093  | <i>P</i> = 0.001 |
| Glucose, mg/dl | 180 ± 20     | 206 ± 14     | <i>P</i> = 0.157 | 119 ± 7.5     | 138 ± 6.9     | <i>P</i> = 0.046 |
| Insulin, ng/ml | 0.681 ± 0.14 | 1.197 ± 0.24 | <i>P</i> = 0.067 | 0.667 ± 0.118 | 1.248 ± 0.172 | <i>P</i> = 0.009 |

Plasma samples were taken after an overnight fast for TAG and cholesterol determination and in the fed state for free fatty acids, glucose, and insulin determination. Values are means ± SEM for *n* = 6 to 7 animals. *P* values are the result of a Student's *t* test.
